# Supplementary material
Source: PubMed Central journal article supplement (PMC6199659)
Supplement: ba023515-suppl1.pdf [file ba023515-suppl1.pdf]

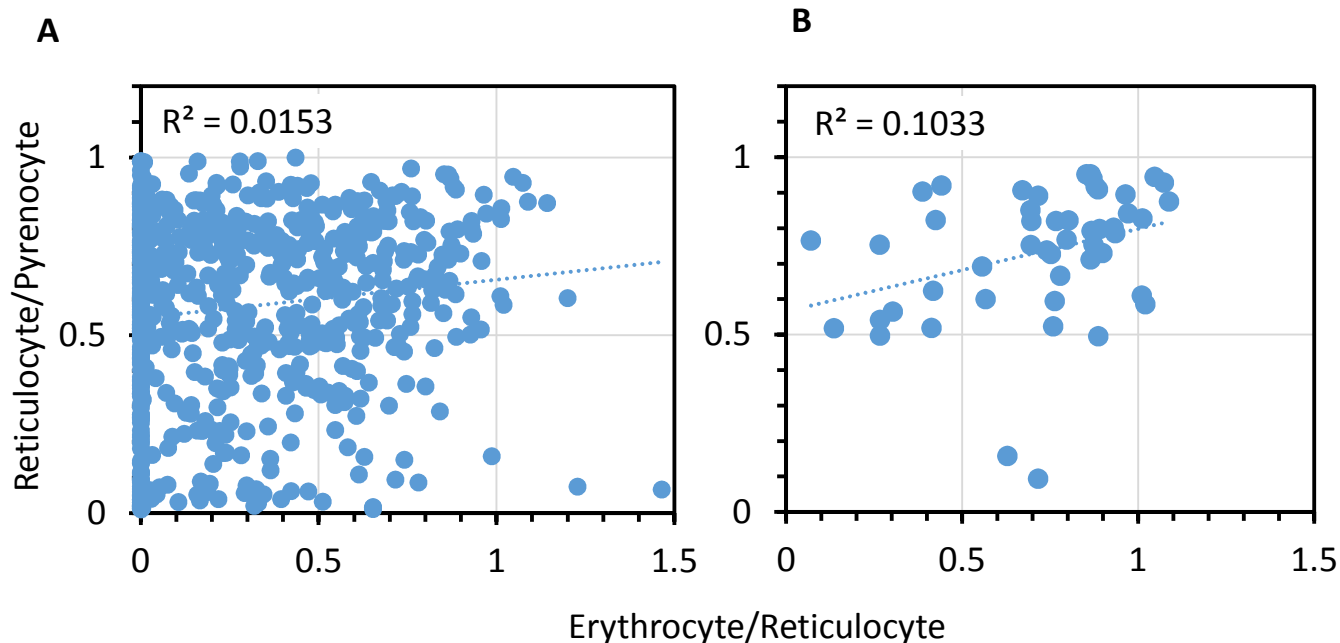

**Figure S1 : Relationship between protein removal during enucleation and during reticulocyte maturation.**

For each protein, the fraction associated with the reticulocyte after enucleation was retrieved from Gautier et al (Gautier EF, Ducamp S, Leduc M, et al. Comprehensive Proteomic Analysis of Human Erythropoiesis. Cell Rep. 2016;16:1470-1484) and the fraction lastly found in erythrocytes (EPP) after reticulocyte maturation was calculated from the absolute quantification values reported in table S1. Part A: Overall data corresponding to the 680 proteins that were quantified both after enucleation and in the circulating reticulocytes

Part B : Data corresponding to the 50 most expressed proteins in the erythrocyte population (EPP)
